# Supplementary material for: Expert perspectives on potential environmental risks from nanomedicines and adequacy of the current guideline on environmental risk assessment
Source: Royal Society of Chemistry journal article supplement (doi:10.1039/c8en00053k), 2018-01-01
Supplement: c8en00053k1.pdf [file c8en00053k1.pdf]

**Supplementary information for:**

**Expert perspectives on potential environmental risks from nanomedicines and adequacy of the current guideline on environmental risk assessment**

Indrani Mahapatra,<sup>1\*</sup> Julian R. A. Clark,<sup>1</sup> Peter J. Dobson,<sup>2</sup> Richard Owen,<sup>3</sup> Iseult Lynch,<sup>1</sup> Jamie R. Lead<sup>4</sup>

*Institutional affiliation:*

<sup>1</sup> School of Geography, Earth and Environmental Sciences, University of Birmingham, Edgbaston, Birmingham, B15 2TT, U.K.

<sup>2</sup> The Queen's College, Oxford OX1 4AW, U.K and Warwick Manufacturing Group, University of Warwick, Coventry, CV4 7AL, U.K.

<sup>3</sup> Department of Management, University of Bristol, The Priory Road Complex, Priory Road, Clifton, Bristol, BS8 1TZ, U.K.

<sup>4</sup> Center for Environmental Nanoscience and Risk, Department of Environmental Health Sciences, Arnold School of Public Health, University of South Carolina, Columbia, South Carolina 29208

## Sample Questions

1. The focus of nanomedicine developers has been to design nanocarriers which can evade the biological barriers in the body and deliver a payload of drug to the target site
  - a. In your opinion, is there a possibility of any environmental hazards and risks from such products?
  - b. What might be the potential hazard and exposure scenarios?
  - c. Are you aware of the existing environmental risk assessment guidelines for pharmaceuticals?

*If yes,*

- i. Do the test methods and protocols mentioned therein adequate for nanomedicines? What might be the limitations? How can they be improved?
- ii. More specifically, in your opinion, is octanol-water partition coefficient ( $\log K_{ow}$ ) the right surrogate for bioaccumulation with respect to future sophisticated materials based on polymers?

*If no,*

- i. Are the existing risk assessment protocols fit-for-purpose for nanomaterials in general? What are the limitations? How can they be improved?
2. Do you think nano-enabled medical devices are likely to pose a threat to the environment? (e.g., AuNPs and SWCNT in devices to detect cancer from breath; silicon nanowires)

**Table S1 List of expert stakeholders as per category interviewed along with dates of the interviews**

| <b>Discipline or category</b> | <b>Name</b>           | <b>Date of interview</b>         |
|-------------------------------|-----------------------|----------------------------------|
| Nanomedicine scientists       | NMS01                 | 12 May 2011                      |
|                               | NMEn02                | 12 May 2011                      |
|                               | NMS03                 | 16 May 2011                      |
|                               | NMS04                 | 17 May 2011* & 29 July 2011      |
|                               | NMS05                 | 8 September 2011                 |
|                               | NMS06                 | 1 November 2011                  |
|                               | NMEn07                | 2 December 2011                  |
|                               | NMS08                 | 17 January 2012                  |
|                               | NMS09                 | 27 January 2012                  |
|                               | NMEn10                | 27 January 2012                  |
|                               | NMS11                 | 14 March 2012                    |
|                               | NMS12                 | 14 March 2012                    |
|                               | NMEn 13.1+<br>NMS13.2 | 30 March 2012                    |
|                               | NMS14                 | 29 May 2012                      |
|                               | NMS15                 | 16 July 2012                     |
|                               | NMS16                 | 16 October 2012                  |
|                               | NMEn17                | 31 October 2012                  |
|                               | NMS18                 | 2 November 2012                  |
|                               | NMS19                 | 6 November 2012                  |
| <b>Total</b>                  |                       | <b>20</b>                        |
| Toxicologists                 | ETOC1                 | 15 February 2012                 |
|                               | HTOC1                 | 13 August 2012                   |
|                               | HTOC2                 | 15 August 2012                   |
|                               | ETOC2                 | 5 September 2012                 |
|                               | ETOC3                 | 8 October 2012                   |
|                               | HTOC3                 | 19 October 2012                  |
|                               | ETOC4                 | 23 October 2012                  |
|                               | HTOC4                 | 30 October 2012                  |
|                               | ETOC5                 | 5 December 2012                  |
| <b>Total</b>                  |                       | <b>9</b>                         |
| Social scientists             | SS01                  | 11 September 2012                |
|                               | SS02                  | 17 October 2012                  |
|                               | SS03                  | 24 October 2012                  |
|                               | SS04                  | 25 October 2012                  |
|                               | SS05                  | 09 November 2012# & 08 July 2013 |
|                               | SS06                  | 14 November 2012                 |
|                               | SS07                  | 15 November 2012                 |
|                               | SS08                  | 11 July 2013                     |
|                               | SS09                  | 2 August 2013                    |
| <b>Total</b>                  |                       | <b>9</b>                         |

|                                                                                                                                                                                                                                                                                                                                                                                                                                                                                                                                                                                                                                                                     |                      |                   |
|---------------------------------------------------------------------------------------------------------------------------------------------------------------------------------------------------------------------------------------------------------------------------------------------------------------------------------------------------------------------------------------------------------------------------------------------------------------------------------------------------------------------------------------------------------------------------------------------------------------------------------------------------------------------|----------------------|-------------------|
| Regulatory agencies and policymakers                                                                                                                                                                                                                                                                                                                                                                                                                                                                                                                                                                                                                                | Regulator 01         | 14 November 2011  |
|                                                                                                                                                                                                                                                                                                                                                                                                                                                                                                                                                                                                                                                                     | PP1.1                | 14 December 2011  |
|                                                                                                                                                                                                                                                                                                                                                                                                                                                                                                                                                                                                                                                                     | PP1.2                | 14 December 2011  |
|                                                                                                                                                                                                                                                                                                                                                                                                                                                                                                                                                                                                                                                                     | PP2.1                | 20 December 2011  |
|                                                                                                                                                                                                                                                                                                                                                                                                                                                                                                                                                                                                                                                                     | PP2.2                | 20 December 2011  |
|                                                                                                                                                                                                                                                                                                                                                                                                                                                                                                                                                                                                                                                                     | Regulator 02 (+1)    | 27 January 2012   |
|                                                                                                                                                                                                                                                                                                                                                                                                                                                                                                                                                                                                                                                                     | Regulator 03<br>MHRA | 2 February 2012   |
|                                                                                                                                                                                                                                                                                                                                                                                                                                                                                                                                                                                                                                                                     | Regulator 04 (+1)    | 24 August 2012    |
|                                                                                                                                                                                                                                                                                                                                                                                                                                                                                                                                                                                                                                                                     | Regulator 05         | 13 November 2012  |
| Regulatory toxicologists                                                                                                                                                                                                                                                                                                                                                                                                                                                                                                                                                                                                                                            | PP2.3                | 20 December 2011  |
| <b>Total</b>                                                                                                                                                                                                                                                                                                                                                                                                                                                                                                                                                                                                                                                        |                      | <b>10 (+2)</b>    |
| Funding agencies                                                                                                                                                                                                                                                                                                                                                                                                                                                                                                                                                                                                                                                    | RC01 (+1)            | 24 April 2012     |
|                                                                                                                                                                                                                                                                                                                                                                                                                                                                                                                                                                                                                                                                     | RC02                 | 22 May 2012       |
|                                                                                                                                                                                                                                                                                                                                                                                                                                                                                                                                                                                                                                                                     | RC03                 | 6 June 2012       |
|                                                                                                                                                                                                                                                                                                                                                                                                                                                                                                                                                                                                                                                                     | RC04                 | 19 June 2012      |
|                                                                                                                                                                                                                                                                                                                                                                                                                                                                                                                                                                                                                                                                     | RC05                 | 15 October 2012   |
|                                                                                                                                                                                                                                                                                                                                                                                                                                                                                                                                                                                                                                                                     | RC 6.1               | 15 July 2013      |
|                                                                                                                                                                                                                                                                                                                                                                                                                                                                                                                                                                                                                                                                     | RC 6.2               | 12 September 2013 |
| <b>Total</b>                                                                                                                                                                                                                                                                                                                                                                                                                                                                                                                                                                                                                                                        |                      | <b>7 (+1)</b>     |
| Industry                                                                                                                                                                                                                                                                                                                                                                                                                                                                                                                                                                                                                                                            | Industry 01          | 3 May 2012        |
|                                                                                                                                                                                                                                                                                                                                                                                                                                                                                                                                                                                                                                                                     | Industry 02          | 9 July 2012       |
|                                                                                                                                                                                                                                                                                                                                                                                                                                                                                                                                                                                                                                                                     | Industry 03          | 13 July 2012      |
|                                                                                                                                                                                                                                                                                                                                                                                                                                                                                                                                                                                                                                                                     | Industry 04          | 12 November 2012  |
|                                                                                                                                                                                                                                                                                                                                                                                                                                                                                                                                                                                                                                                                     | Industry 05          | 12 July 2013      |
|                                                                                                                                                                                                                                                                                                                                                                                                                                                                                                                                                                                                                                                                     | Industry 06          | 17 July 2013      |
|                                                                                                                                                                                                                                                                                                                                                                                                                                                                                                                                                                                                                                                                     | Industry 07          | 30 July 2013      |
|                                                                                                                                                                                                                                                                                                                                                                                                                                                                                                                                                                                                                                                                     | Industry 08          | 7 August 2013     |
| <b>Total</b>                                                                                                                                                                                                                                                                                                                                                                                                                                                                                                                                                                                                                                                        |                      | <b>8</b>          |
| <p>*The recorder containing the first interview with NMS 04 was lost. Hence, a repeat interview was done.</p> <p>‡Due to Skype disturbances, there was lot of noise in the recoding. Hence, a repeat interview was done.</p> <p>Note: When two or more interviewees were interviewed from the same organisation, the numbering is X.1, X.2, and X.3 and if there were more than one expert during the interview, the additional expert is shown in brackets.</p> <p>Abbreviations: NMS, nanomedicine scientist; NME n, nanomedicine entrepreneur; HTOC, human toxicologist; ETOC, ecotoxicologist; RC, Research Council; SS, Social scientist; PP, policymaker.</p> |                      |                   |
